# Supplementary material for: Technical note: Apportionment of Southeast Asian Biomass Burning and Urban Influence via In Situ Trace Gas Enhancement Ratios
Source: Copernicus journal article supplement (doi:10.5194/egusphere-2025-1454), 2025-05-14
Supplement: Supplementary file [file egusphere-2025-1454-AC1-supplement.pdf]

Review of "Technical note: Apportionment of Southeast Asian Biomass Burning and Urban Influence via In Situ Trace Gas Enhancement Ratios" by DiGangi and coauthors

Author responses in red. We thank the reviewer for their time and detail examining our manuscript!

This is a straightforward technical note presenting the usefulness of enhancement ratios of CH<sub>4</sub> to CO to identify/constrain various origin source signatures in regions influenced by various air masses transported to a measurement location. This technique is reasonably sound and appears to be useful for apportioning data from different source regimes in the absence of measurements of more specific chemical tracers (i.e., VOCs or other non-organic gases like HCN that are emitted nearly exclusively from specific anthropogenic or biomass burning emissions sources.) This should be made clear in the paper.

We have added language to both the conclusion and abstract to emphasize this point.

Once this and the following comments and technical corrections are addressed, this technical note should be published in ACP.

Lines 129-130 and Figure S1: The brief description of the use of a  $\pm 5$  ppb CO and CH<sub>4</sub> hysteresis could use a little more explanation. The dashed lines for CH<sub>4</sub>,  $1.85 + 0.04 = 1.89$  ppm, and  $\pm 5$  ppb ( $\pm 0.005$  ppb) would be  $1.885 - 1.895$ , and for CO,  $65 \text{ ppb} + 55 \text{ ppb} = 120 \text{ ppb}$ , and then  $\pm 5$  ppb would be from  $115-125$  ppb? The dashed lines in Fig. S1 are each 5 ppb above those ( $1.89 - 1.90$  ppm for CH<sub>4</sub> and  $120 - 130$  for CO), which seem too high for the explanation given in the text.

Indeed, this should have been described as an additional  $\Delta 10$  ppb hysteresis, and the figure as it exists in the supplement is the correct representation. We have altered the text to correct this error.

Technical corrections:

Lines 14, 73, 78, etc.: "Seas" should be capitalized.

We have corrected this in all instances.

Lines 21, 22, 23, 36, 38, etc.: "air mass" and "air masses" should both be two words.

We have corrected this in all instances.

Line 29: I believe it should be "enables" (novel approach is singular).

We have made this correction.

Line 53: it would be better to spell out “many days to weeks”.

We have made this correction.

Lines 118, 137, and Figs. 2 and S2 captions: “vs.” should have a period.

We have made this correction.

Line 130: Supplemental Fig. S1. (Technically, “Supplemental” isn’t needed, either – the S is sufficient.) (Similarly, Fig. S2 – line 157).

We have made this correction.

Figure 2 caption: I recommend making this a proper sentence: “... colored by regime excluding Clark-influenced data using (a) a global background method, (b) a rolling slope method, and (c) a final combined method.”

We have made this correction.

Table 1: in the first column there are two CH<sub>4</sub>s that need the 4s subscripted.

We have made this correction.

Lines 156-158: This sentence seems awkward. I recommend either add another comma, or change the comma to a semicolon and add a “was” before identified, maybe?

The sentence was clarified to now read; “A separate population of data was flagged as another special case shown in Fig. S2, where a lobe in the  $\Delta\text{CH}_4/\Delta\text{CO}$  scatterplot (Fig. S2a) was identified due to a strong anticorrelation between ozone and water vapor data (Fig. S2b) at low water mixing ratios (< 8000 ppmv).”

Line 160: remove “Jr.” -- generally, suffixes aren’t included in in-text citations.

We have made this correction.

Line 161: Fig. S2c-d -- it is still a single figure being referenced.

We have made this correction.

Lines 182, 191, Fig. 3 caption, etc.: “back trajectory” and “back trajectories” should each be two words.

We have made this correction.

Line 191: “Figure 3 shows...”

We have made this correction.

Line 219: "Figure 4a shows..."

We have made this correction.

Line 223: remove "the" before "February-April"

We have made this correction.

Line 228: "Fig. 4b"

We have made this correction.

Line 215: The legend colors in Fig. 5 do not correspond to the colors in the pie charts in (a)-(f).

We have corrected the ammonium color in the legend.

Lines 245 and 253: Maybe use "BB/urban" similar to the Fig. 5g category name instead of "biomass/urban", to be clear that this isn't a mixture of biogenic and urban emissions.

We have made this correction.

Line 250: "Fig. 5a"

We have made this correction.

Line 257: "Figure 6 shows..."

We have made this correction.

Line 260: delete one "urban".

We have made this correction.

Line 270: remove "sloped" x2: "... with higher  $\Delta\text{CH}_4/\Delta\text{CO}$  corresponding to local emissions and lower  $\Delta\text{CH}_4/\Delta\text{CO}$  corresponding..." Similarly, consider using "relationship" instead of "slope" in the rest of this paragraph.

We have made this correction.

Lines 305-end: I believe the journal names should be abbreviated.

We have corrected the references to include abbreviated journal names.

Line 347: there is a rogue “\$” in the CAMP<sup>2</sup>Ex name.

We have made this correction.

Line 411: CO<sub>2</sub> should have a subscripted 2.

We have made this correction.
